# Supplementary material for: Induction of autophagy-dependent ferroptosis to eliminate drug-tolerant human retinoblastoma cells
Source: PubMed Central journal article supplement (PMC9163041; doi:10.1038/s41419-022-04974-8), 2022-06-02

Fig.1D

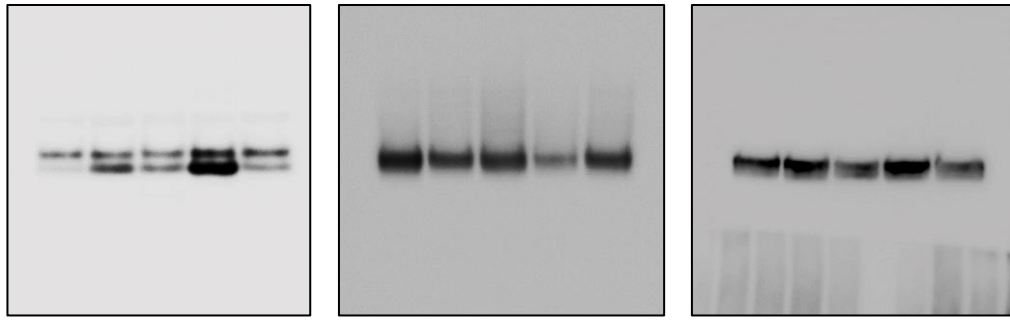

Fig.1G

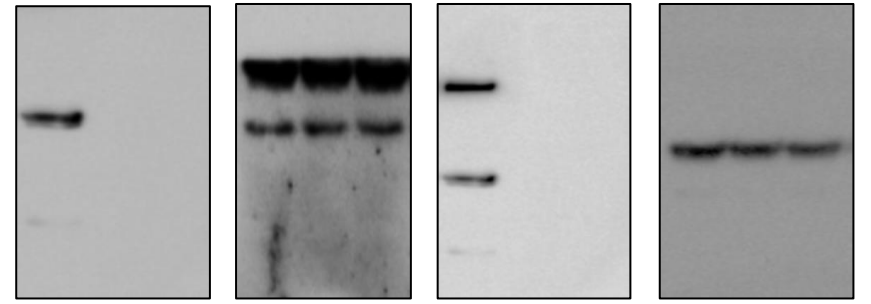

Fig.2C

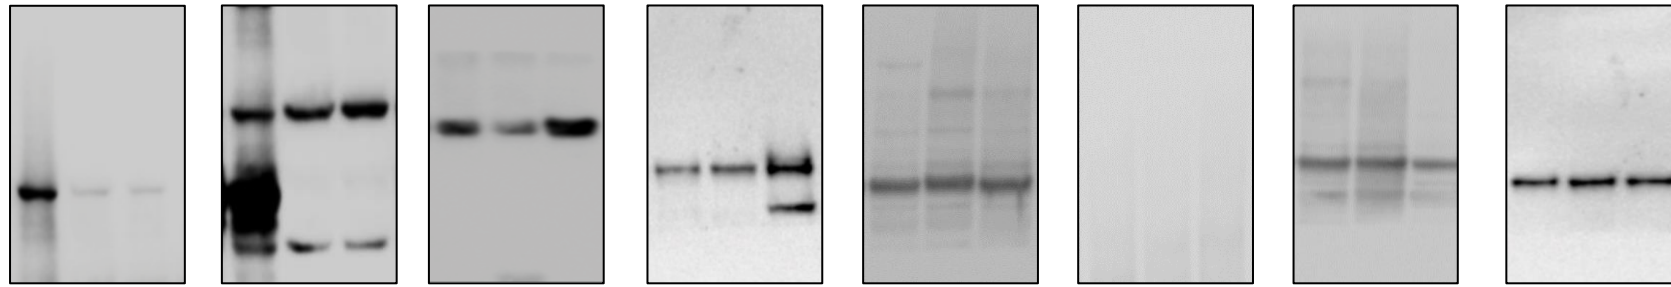

Fig.3A

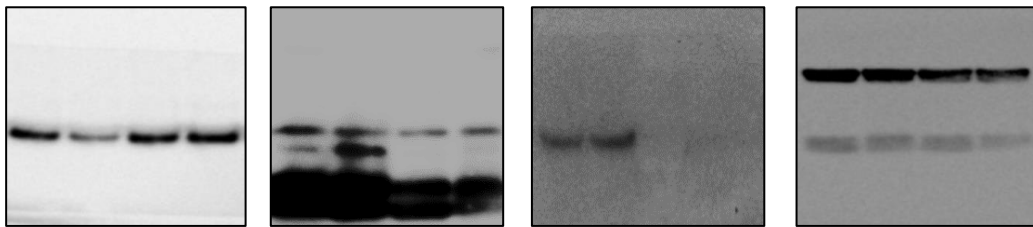

Fig.3C

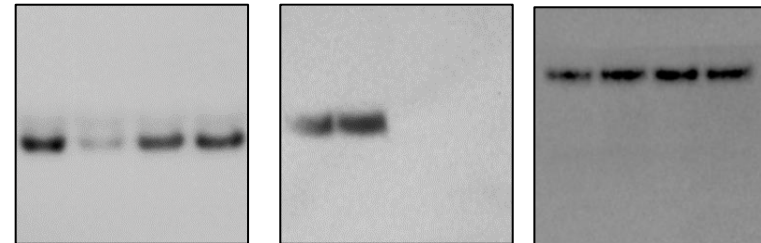

Fig.4E

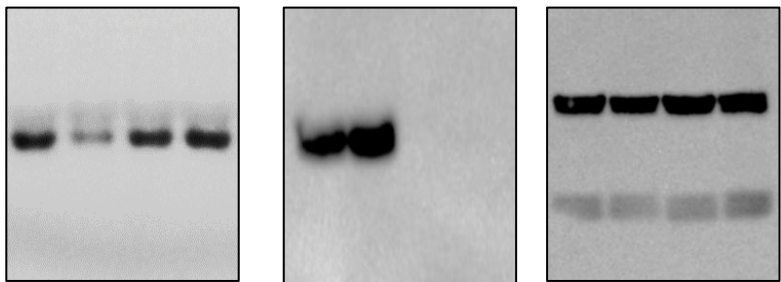

Fig.4K

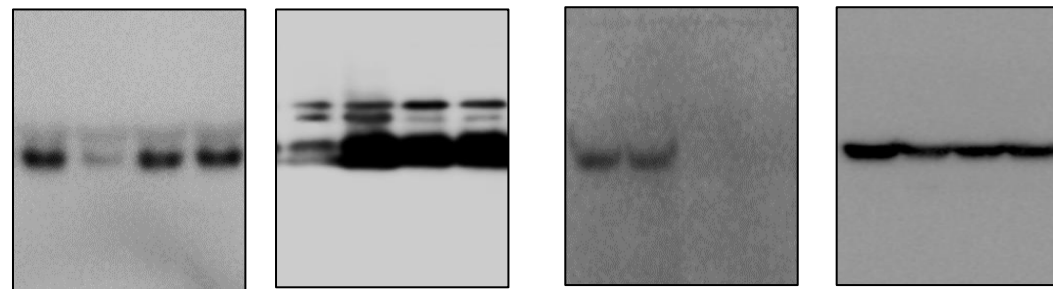

Fig.5B

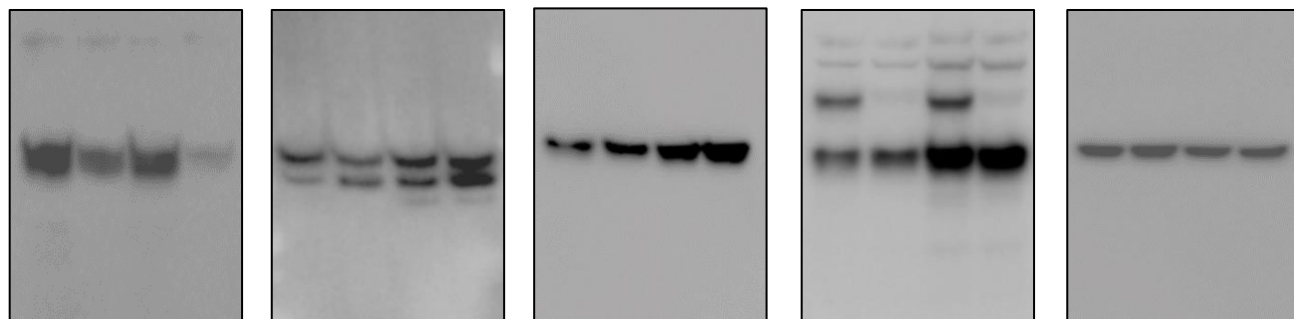

Supplement: 41419_2022_4974_MOESM2_ESM.pdf [file 41419_2022_4974_MOESM2_ESM.pdf]
